# Supplementary material for: Artificial Insemination as an Alternative Transmission Route for African Swine Fever Virus
Source: MDPI journal article supplement (doi:10.3390/pathogens11121539), 2022-12-14

Artificial insemination as alternative transmission route for African Swine Fever Virus  
Supplementary Figure S1.: Viral genome in rectal swabs and feces of boars.

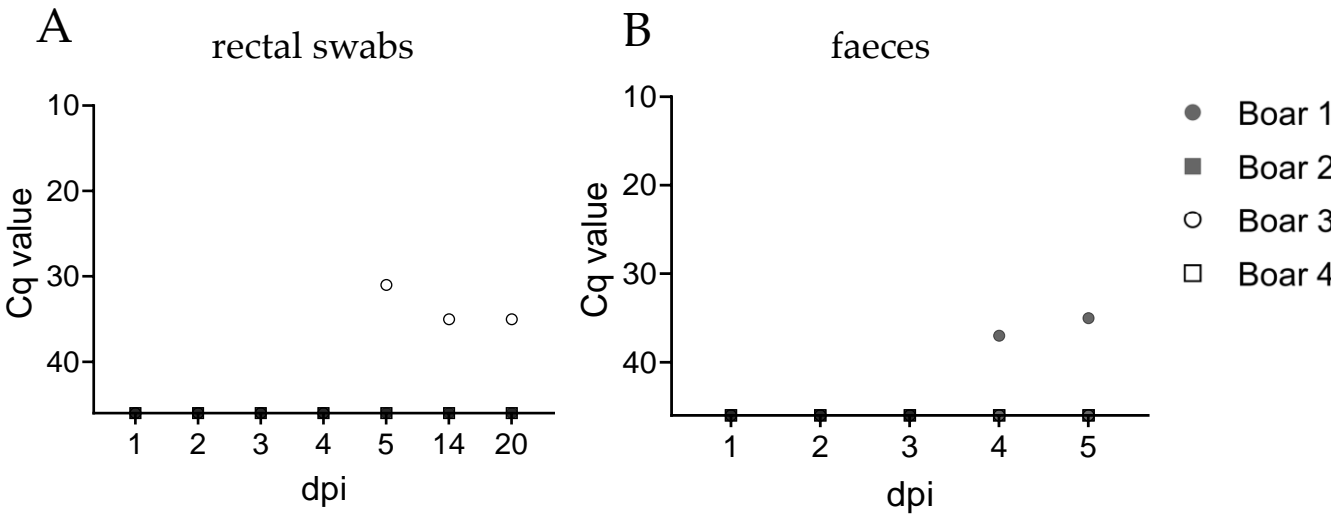

Supplement: s1 [file s1]
